# Supplementary material for: 13C NMR characterization of hydrated 13C labeled Bombyx mori silk fibroin sponges prepared using glycerin, poly(ethylene glycol diglycidyl ether) and poly(ethylene glycol) as porogens
Source: Royal Society of Chemistry journal article supplement (doi:10.1039/c7tb00323d), 2017-01-01
Supplement: c7tb00323d1.pdf [file c7tb00323d1.pdf]

## Electronic Supplementary Information

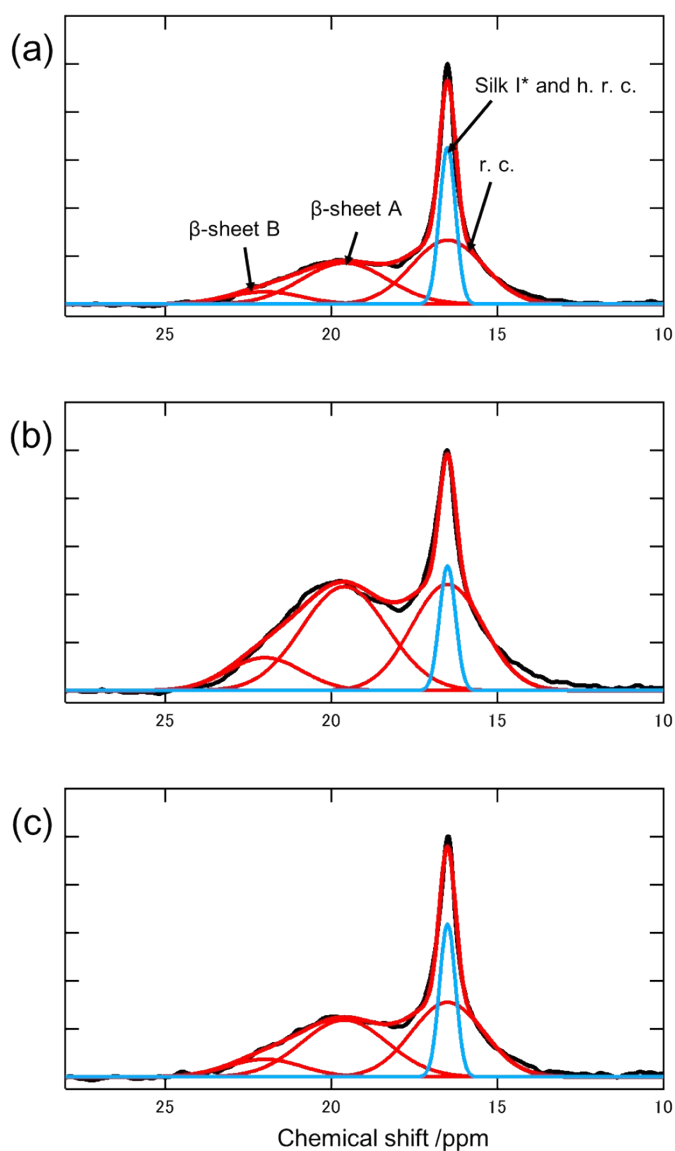

S-1

Observed and deconvoluted  $^{13}\text{C}$  DD/MAS NMR spectra of Ala  $\text{C}\beta$  carbons of hydrated  $[3-^{13}\text{C}]$ Ala-,  $[3-^{13}\text{C}]$ Ser- and  $[3-^{13}\text{C}]$ Tyr-*B. mori* silk fibroin sponges prepared with (a) Glycerin (Glyc), (b) Poly(ethylene glycol diglycidyl ether) (PGDE) and (c) Poly(ethylene glycol) (PEG) as porogen (SF/porogen ratio 70:30 w/w). Here, r.c.: random coil and h.r.c.: hydrated random coil.

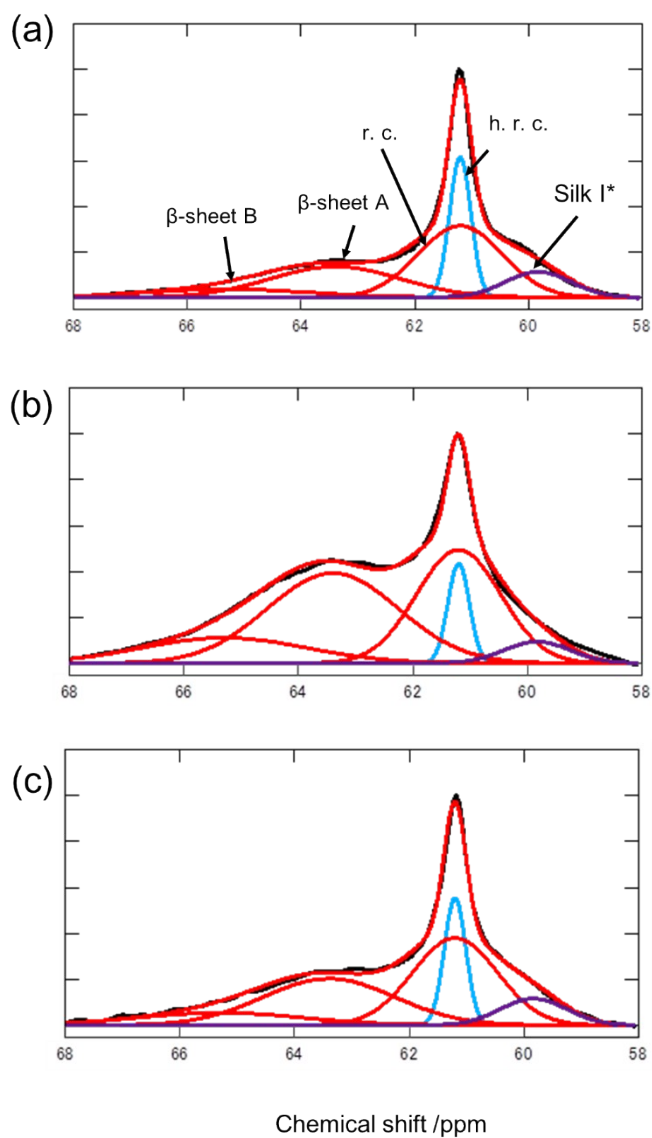

S-2

Observed and deconvoluted  $^{13}\text{C}$  DD/MAS NMR spectra of Ser C $\beta$  carbons of hydrated  $[3-^{13}\text{C}]$ Ala-,  $[3-^{13}\text{C}]$ Ser- and  $[3-^{13}\text{C}]$ Tyr-*B. mori* silk fibroin sponges prepared with (a)Glycerin (Glyc), (b) Poly(ethylene glycol diglycidyl ether) (PGDE) and (c) Poly(ethylene glycol) (PEG) as porogen (SF/porogen ratio 70:30 w/w). Here, r.c.: random coil and h.r.c. : hydrated random coil.

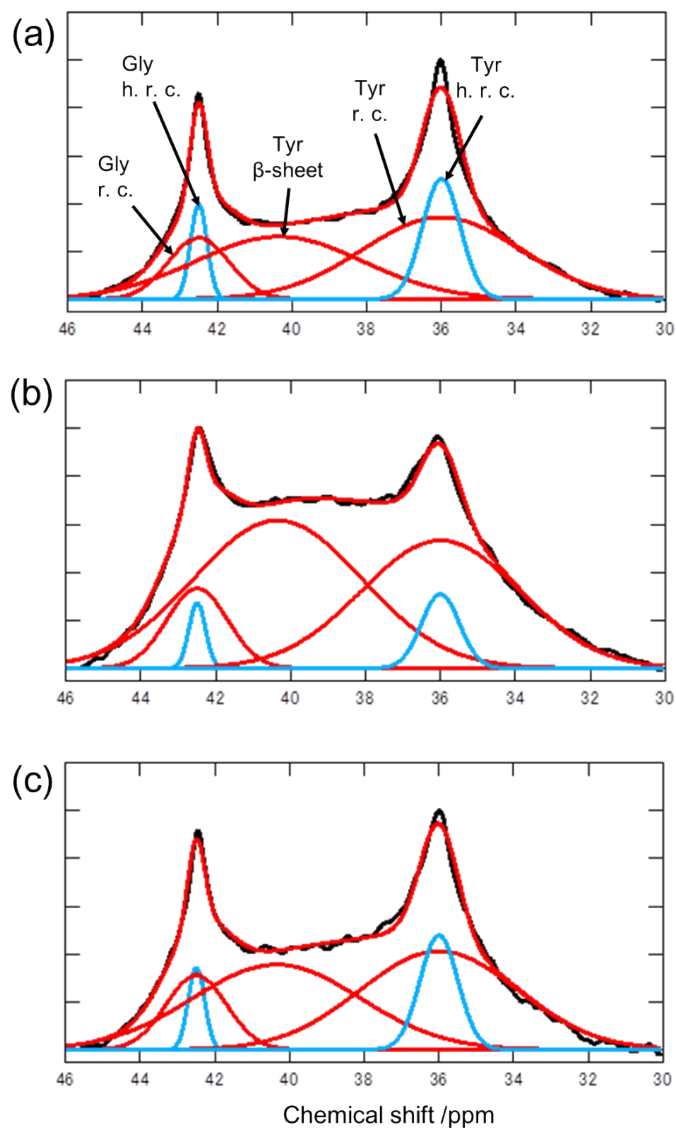

S-3

Observed and deconvoluted  $^{13}\text{C}$  DD/MAS NMR spectra of Tyr  $\text{C}\beta$  and Gly  $\text{C}\alpha$  carbons of hydrated  $[3-^{13}\text{C}]\text{Ala-}$ ,  $[3-^{13}\text{C}]\text{Ser-}$  and  $[3-^{13}\text{C}]\text{Tyr-}$  *B. mori* silk fibroin sponges prepared with (a) Glycerin (Glyc), (b) Poly(ethylene glycol diglycidyl ether) (PGDE) and (c) Poly(ethylene glycol) (PEG) as porogen (SF/porogen ratio 70:30 w/w). Here, r.c.: random coil and h.r.c. : hydrated random coil.
